# Supplementary material for: Age Specific Risks of Uterine Cancer in Type 2 Diabetes and Associated Comorbidities in Taiwan
Source: MDPI journal article supplement (doi:10.3390/cancers14194912), 2022-10-07
Supplement: s1 [file s1]

# Supplementary Materials: Age Specific Risks of Uterine Cancer in Type 2 Diabetes and Associated Comorbidities in Taiwan

Hui-Shan Liu, Chin-Der Chen, Chung-Chen Lee, Yong-Chen Chen and Wen-Fang Cheng

**Table S1.** Coding diagnosis of any cancer, hysterectomy, comorbidities, and drug use in enrolled subjects.

|                         | Definitions                                 | Code                                                                                                                                                                                            |
|-------------------------|---------------------------------------------|-------------------------------------------------------------------------------------------------------------------------------------------------------------------------------------------------|
| <b>Exclusion</b>        |                                             |                                                                                                                                                                                                 |
| Diagnosis of any cancer | Defined from diagnosis <sup>a</sup>         | ICD-9 : 140-208<br>ICD-O-3: C00-C97                                                                                                                                                             |
| Hysterectomy            | Defined from surgery performed <sup>b</sup> | NHI Procedure Code:<br>80403B、80404C、80411B、80412B、80413B、80414B、80416B、80421B、80429B、80430B、<br>81005C、81029C、97022B、97027C、97037B、N26034、80026B、80027B、78020B、80418B、<br>80417B、80424B、N26037 |
| <b>Comorbidities</b>    |                                             |                                                                                                                                                                                                 |
| DM                      | Defined from diagnosis <sup>c</sup>         | ICD-9 : 250                                                                                                                                                                                     |
| PCOS                    | Defined from diagnosis <sup>d</sup>         | ICD-9 : 256.4                                                                                                                                                                                   |
| Obesity                 | Defined from diagnosis <sup>d</sup>         | ICD-9 : 278.0                                                                                                                                                                                   |
| HPL                     | Defined from diagnosis <sup>d</sup>         | ICD-9 : 272.4、272.9                                                                                                                                                                             |
| <b>Drug Use</b>         |                                             |                                                                                                                                                                                                 |
| HRT                     | Defined from drug prescription <sup>e</sup> | ATC code : G03C、G03F                                                                                                                                                                            |
| Statin use              | Defined from drug prescription <sup>e</sup> | ATC code : C10AA、C10BX03                                                                                                                                                                        |

**a** Cancer including uterine cancer was established based on at least one time records of ICD-9 codes and ICD-O-3 in Taiwan cancer registry database. **b** The surgery performed was established based on at least one time record of procedure codes in the NHI inpatient database. **c** To ensure accuracy, DM were established based on at least three times inpatient or outpatient records of ICD-9 codes in the NHI database. **d** Comorbidities were established based on at least one time inpatient or outpatient records of ICD-9 codes in the NHI database. **e** Drug usage was established based on at least one time inpatient or outpatient record of drug prescription codes in the NHI database.

**Table S2.** Histopathological subtypes of uterine cancers according to the World Health Organization Classification of Tumors.

| Clinical outcomes         |                                     |                                                               |
|---------------------------|-------------------------------------|---------------------------------------------------------------|
| Uterine cancer            | Defined from diagnosis <sup>a</sup> | ICD-9 : 182<br>ICD-10 : C54                                   |
| Subtype of uterine cancer | -                                   | -                                                             |
| Endometrioid              | Defined from diagnosis <sup>f</sup> | ICD-O-3 M-code : 8140、8262、8380、8381、8382、8383、8480、8481、8570 |
| Clear cell                | Defined from diagnosis <sup>f</sup> | ICD-O-3 M-code : 8310                                         |
| Serous                    | Defined from diagnosis <sup>f</sup> | ICD-O-3 M-code : 8461                                         |
| Carcinosarcoma            | Defined from diagnosis <sup>f</sup> | ICD-O-3 M-code : 8950、8980                                    |
| ESS                       | Defined from diagnosis <sup>f</sup> | ICD-O-3 M-code : 8930                                         |
| LGESS                     | Defined from diagnosis <sup>f</sup> | ICD-O-3 M-code : 8931                                         |
| LMS                       | Defined from diagnosis <sup>f</sup> | ICD-O-3 M-code : 8890、8891、8896                               |
| Adenosarcoma              | Defined from diagnosis <sup>f</sup> | ICD-O-3 M-code : 8933                                         |
| Others                    | Defined from diagnosis <sup>f</sup> | Diagnosed with uterine cancer, but not classified as above    |

**a** Cancer including uterine cancer was established based on at least one time records of ICD-9 codes and ICD-O-3 in Taiwan cancer registry database. **f** The uterine cancer subtype was defined based on the ICD-O-3 morphological code in the database of the Taiwan Cancer Registry. **ICD-9**: International Classification of Diseases, 9th Revision, **ICD-O-3**: International Classification of Diseases for Oncology, 3rd edition, **NHI**: National Health Insurance, **M-code**: morphology code, **ESS** denotes endometrial stromal sarcoma, **LGESS** low grade endometrial stromal sarcoma, **LMS** leiomyosarcoma.

**Table S3.** Adjusted HR of uterine cancer in different subgroups stratified by HPL and statins in age < 50 years and ≥ 50 years.

| < 50 years |         |         |           |             |        | ≥ 50 years |           |             |        |
|------------|---------|---------|-----------|-------------|--------|------------|-----------|-------------|--------|
| HPL        | Statins | N       | Adjust HR | 95% CI      | P      | N          | Adjust HR | 95% CI      | P      |
| -          | -       | 3207338 | ref       | -           | -      | 1297693    | ref       | -           | -      |
| -          | +       | 33351   | 1.41      | 1.18 - 1.68 | 0.0001 | 97824      | 0.98      | 0.87 - 1.09 | 0.6567 |
| +          | -       | 119637  | 1.38      | 1.25 - 1.52 | <.0001 | 155285     | 0.92      | 0.84 - 1.01 | 0.0795 |
| +          | +       | 43069   | 1.59      | 1.37 - 1.84 | <.0001 | 150045     | 0.85      | 0.78 - 0.94 | 0.0012 |

**Adjust variables:** DM, PCOS, obesity, hyperlipidemia, HRT, HR denotes hazard ratio, CI confidence interval, HPL hyperlipidem.
